# Supplementary material for: Ecology and phylogeny of birds foraging at outdoor restaurants in Sweden
Source: Biodivers Data J. 2015 Sep 24;(3):e6360. doi: 10.3897/BDJ.3.e6360 (PMC4609751; doi:10.3897/BDJ.3.e6360)
Supplement: Supplementary material 2 — Densities of birds at outdoor restaurants in Sweden [file biodiversity_data_journal-3-e6360-s002.xlsx]

## Sheet: Blad1
Landscape Province	Restaurant #	Passer domesticus	Passer montanus	Motacilla alba	Fringilla coelebs	Parus major	Coloeus monedula	Pica pica	Corvus cornix	Corvus frugilegus	Columba livia	Larus canus	Larus ridibundus	Larus argentatus	200 Meter Scale (% Urban)	500 Meter Scale (% Urban)	1000 Meter Scale (% Urban)
		Minutes/Hour/100 M2	Minutes/Hour/100 M2	Minutes/Hour/100 M2	Minutes/Hour/100 M2	Minutes/Hour/100 M2	Minutes/Hour/100 M2	Minutes/Hour/100 M2	Minutes/Hour/100 M2	Minutes/Hour/100 M2	Minutes/Hour/100 M2	Minutes/Hour/100 M2	Minutes/Hour/100 M2	Minutes/Hour/100 M2
Småland	1	36.14									7.23				98	73	56
Småland	2						27.67	3.07							88	83	86
Småland	3	121.6					171.17								65	56	39
Småland	4	11.92					31.30								100	89	69
Östergötland	8						8.83								100	94	80
Västergötland	9	73.51													100	94	80
Västergötland	10						21.37				9.65				100	96	95
Småland	11										33.33				100	82	86
Småland	12	15.56					42.22								85	92	78
Småland	13						4.92								100	95	96
Småland	14						15.94								52	22	12
Östergötland	16	174.19					33.8								100	75	72
Västergötland	17	3.35					0.96								95	69	56
Östergötland	18	48.40					4.84						5.92		25	33	43
Östergötland	20						16.38								13	26	31
Västergötland	21						14.80								9	33	43
Västergötland	22	19.26					84.75								46	42	24
Småland	23					3.21									0	0	0
Västergötland	24							3.11							59	54	49
Västergötland	25	10.31													100	100	95
Västergötland	26			1.00											41	32	12
Småland	27	6.53					5.60								98	100	86
Småland	28					6.55									0	0	0
Östergötland	29			2.34											20	11	7
Småland	30		10.20	2.55											25	7	7
Västergötland	31						158.96								100	100	100
Östergötland	32			0.92											0	0	0
Småland	33	19.82		0.73											42	9	6
Västergötland	35						17.27						0.96		49	48	45
Västergötland	36	16.64					6.40								51	53	59
Småland	37	8.67		1.98			1.24								62	28	24
Småland	38			4.41											0	0	4
Närke	39			2.10											0	0	15
Östergötland	40						5.22								100	64	20
Västergötland	41					4.02									46	38	25
Halland	42			5.75											7	15	8
Östergötland	43	25.45													34	7	2
Västergötland	44			8.25		2.36									0	3	2
Västergötland	45			23.95				2.25							0	0	3
Småland	46			5.89		2.95									0	0	0
Småland	47	40.54					51.60								100	100	96
Småland	48						58.79								97	76	59
Bohuslän	49						66.00								39	45	16
Västergötland	50			4.23											0	0	0
Västergötland	51	104.17													61	30	29
Bohuslän	52	162.14		7.35											33	27	15
Småland	53		85.71	0.96				1.93							0	4	9
Småland	54							1.34							8	21	17
Västergötland	55	89.69					7.63								12	43	54
Halland	56			3.75			14.57		1.46	12.90					100	89	70
Småland	57					13.37									27	23	11
Östergötland	58	58.43		13.95											0	1	1
Östergötland	59						10.09								86	92	91
Småland	61				3.92										0	0	0
Småland	62						10.76								54	46	33
Småland	63			2.41											0	33	43
Skåne	65	314.77		1.04					1.04						0	3	3
Halland	66	60.25													0	0	2
Halland	67	66.21					23.47							1.68	100	100	85
Småland	69	198.81					9.04								100	100	92
Värmland	70				26.05										0	0	3
Småland	71			2.48		8.68									0	0	2
Västergötland	72	5.63		10.63											19	34	26
Småland	73			3.50											0	0	0
Västergötland	74		5.60					3.20							0	0	0
Västergötland	75	485.29					5.88								100	100	100
Västergötland	76						62.87					2.03			76	60	57
Halland	77	60.41													97	90	93
Halland	78	203.81													95	63	28
Västergötland	79	76.57													45	65	82
Västergötland	80		26.79			8.93									0	5	8
Västergötland	81						10.20								98	100	99
Västergötland	83					1.75									0	0	0
Östergötland	84	94.20					2.72								92	68	57
Östergötland	85					4.94									0	0	0
Västergötland	86	2.74					53.53								100	93	64
Småland	87						1.95								100	99	81
Småland	88							1.95							100	98	77
Östergötland	89	195.99					13.07								100	77	64
Halland	90	5.10					21.43								82	95	74
